# Supplementary material
Source: ML conference proceedings conference paper supplement (https://openaccess.thecvf.com/content/CVPR2023/html/Guo_Texts_as_Images_CVPR_2023_paper.html)
Supplement: Supplementary file 2 [file Guo_Texts_as_Images_CVPR_2023_supplemental.zip]

Archive with 4 entries (4 files):
- 3495suppl/3495cmr_Suppl_envelope.pdf
- 3495suppl/prompt_templates.txt
- 3495suppl/synonyms_COCO.txt
- 3495suppl/synonyms_NUSWIDE.txt
