# Supplementary material
Source: ML conference proceedings conference paper supplement (https://openaccess.thecvf.com/content/CVPR2023/html/Guo_Texts_as_Images_CVPR_2023_paper.html)
Supplement: Supplementary file 2 [file Guo_Texts_as_Images_CVPR_2023_supplemental.zip › 3495suppl/synonyms_COCO.txt]

{'person','human','people','man','woman','passenger'}
{'bicycle','bike','cycle'}
{'car','taxi','auto','automobile','motor car'}
{'motor bike','motor cycle'}
{'aeroplane','air craft','jet','plane','air plane'}
{'bus','autobus','coach','charabanc','double decker','jitney','motor bus','motor coach','omnibus'}
{'train','rail way','railroad'}
{'truck'}
{'boat','raft','dinghy'}
{'traffic light'}
{'fire hydrant','fire tap','hydrant'}
{'stop sign','halt sign'}
{'parking meter'}
{'bench'}
{'bird'}
{'cat','kitty'}
{'dog','pup','puppy','doggy'}
{'horse','colt','equus'}
{'sheep'}
{'cow'}
{'elephant'}
{'bear'}
{'zebra'}
{'giraffe','camelopard'}
{'backpack','back pack','knapsack','packsack','rucksack','haversack'}
{'umbrella'}
{'handbag','hand bag','pocketbook','purse'}
{'tie','necktie'}
{'suitcase'}
{'frisbee'}
{'skis','ski'}
{'snowboard'}
{'sports ball','sport ball','ball','football','soccer','tennis','basketball','baseball'}
{'kite'}
{'baseball bat','baseball game bat'}
{'baseball glove','baseball mitt','baseball game glove'}
{'skateboard'}
{'surfboard'}
{'tennis racket'}
{'bottle'}
{'wine glass','vino glass'}
{'cup'}
{'fork'}
{'knife'}
{'spoon'}
{'bowl'}
{'banana'}
{'apple'}
{'sandwich'}
{'orange'}
{'broccoli'}
{'carrot'}
{'hot dog'}
{'pizza'}
{'donut','doughnut'}
{'cake'}
{'chair','arm chair'}
{'couch','sofa'}
{'potted plant','house plant','bonsai','pot plant'}
{'bed'}
{'dining table','dinner table','table','din table'}
{'toilet','commode'}
{'tv','tvmonitor','monitor','television','telly'}
{'laptop'}
{'mouse'}
{'remote'}
{'keyboard'}
{'cell phone','phone','mobile phone'}
{'microwave'}
{'oven','roaster'}
{'toaster'}
{'sink'}
{'refrigerator','icebox'}
{'book'}
{'clock'}
{'vase'}
{'scissors'}
{'teddy bear','teddy'}
{'hair drier','blowing machine','hair dryer','dryer','blow dryer','blown dry','blow dry'}
{'toothbrush'}
