# Supplementary material
Source: ML conference proceedings conference paper supplement (https://openaccess.thecvf.com/content/CVPR2023/html/Guo_Texts_as_Images_CVPR_2023_paper.html)
Supplement: Supplementary file 2 [file Guo_Texts_as_Images_CVPR_2023_supplemental.zip › 3495suppl/synonyms_NUSWIDE.txt]

{'airport','air port','air field','runway'}
{'animal'}
{'beach','plage','coast','seashore'}
{'bear'}
{'birds','bird'}
{'boats','boat','raft','dinghy'}
{'book'}
{'bridge'}
{'buildings','building'}
{'cars','car'}
{'castle'}
{'cat','kitty'}
{'cityscape','city','skyscraper'}
{'clouds','cloud'}
{'computer','desktop','laptop'}
{'coral'}
{'cow'}
{'dancing','dance'}
{'dog','pup','puppy','doggy'}
{'earthquake','collapse building','break building','broken building'}
{'elk','deer'}
{'fire'}
{'fish'}
{'flags','flag'}
{'flowers','flower'}
{'food'}
{'fox'}
{'frost','forsted'}
{'garden'}
{'glacier','ice'}
{'grass'}
{'harbor','port','harbour'}
{'horses','horse'}
{'house'}
{'lake'}
{'leaf'}
{'map'}
{'military','army','troops','troop'}
{'moon'}
{'mountain','hill'}
{'nighttime','night time','night'}
{'ocean','sea'}
{'person','human','people','man','woman','passenger'}
{'plane','aeroplane','air craft','jet','air plane'}
{'plants','plant'}
{'police'}
{'protest'}
{'railroad','rail road','rail way'}
{'rainbow'}
{'reflection'}
{'road','path','way'}
{'rocks','rock'}
{'running','run'}
{'sand'}
{'sign'}
{'sky'}
{'snow'}
{'soccer','football'}
{'sports','sport'}
{'statue'}
{'street'}
{'sun'}
{'sunset'}
{'surf'}
{'swimmers','swimmer','swimming','swim'}
{'tattoo','tattooing'}
{'temple'}
{'tiger'}
{'tower'}
{'town'}
{'toy'}
{'train'}
{'tree'}
{'valley'}
{'vehicle'}
{'water'}
{'waterfall'}
{'wedding','engagement','bride','groom'}
{'whales','whale'}
{'window'}
{'zebra'}
